# Supplementary material for: CASA: a comprehensive database resource for the COVID-19 Alternative Splicing Atlas
Source: Springer Nature journal article supplement (doi:10.1186/s12967-022-03699-8), 2022-10-20

**A**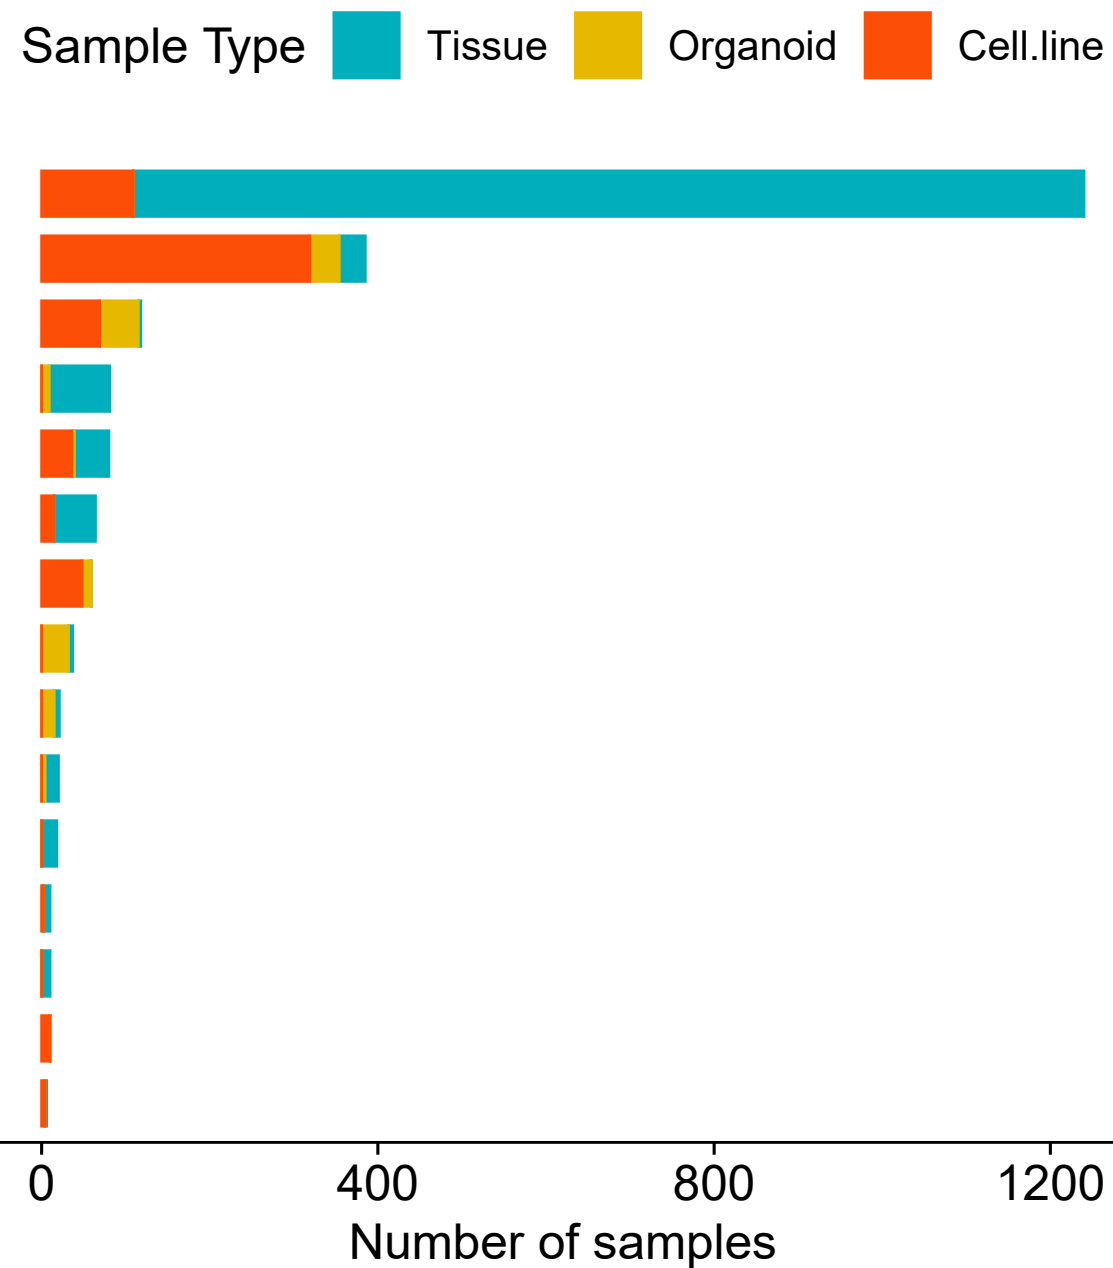**B**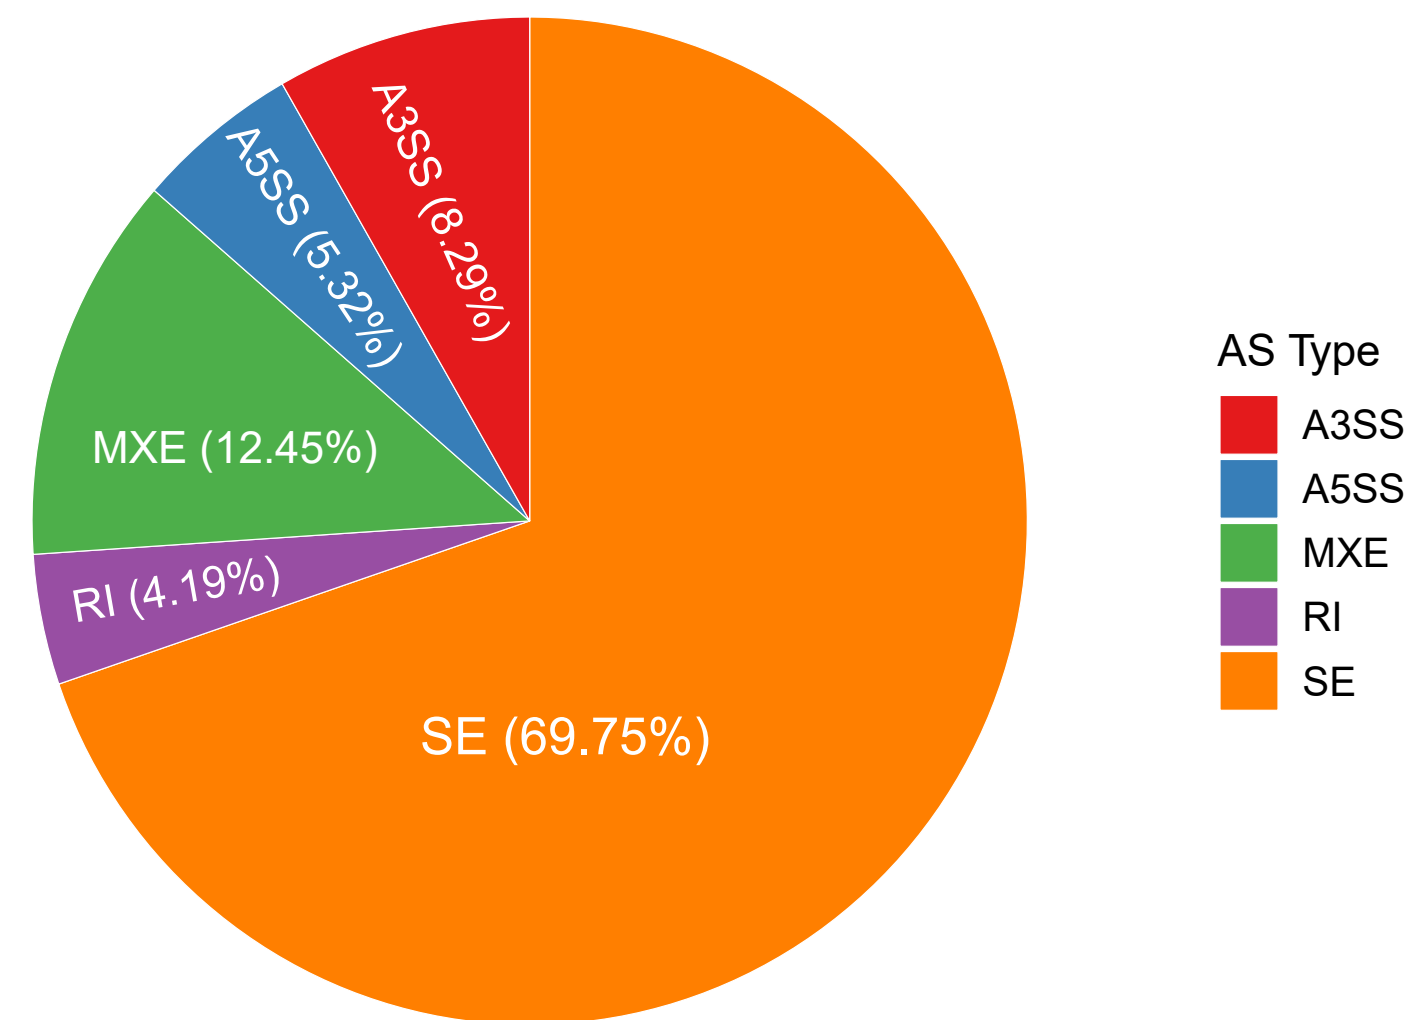**C**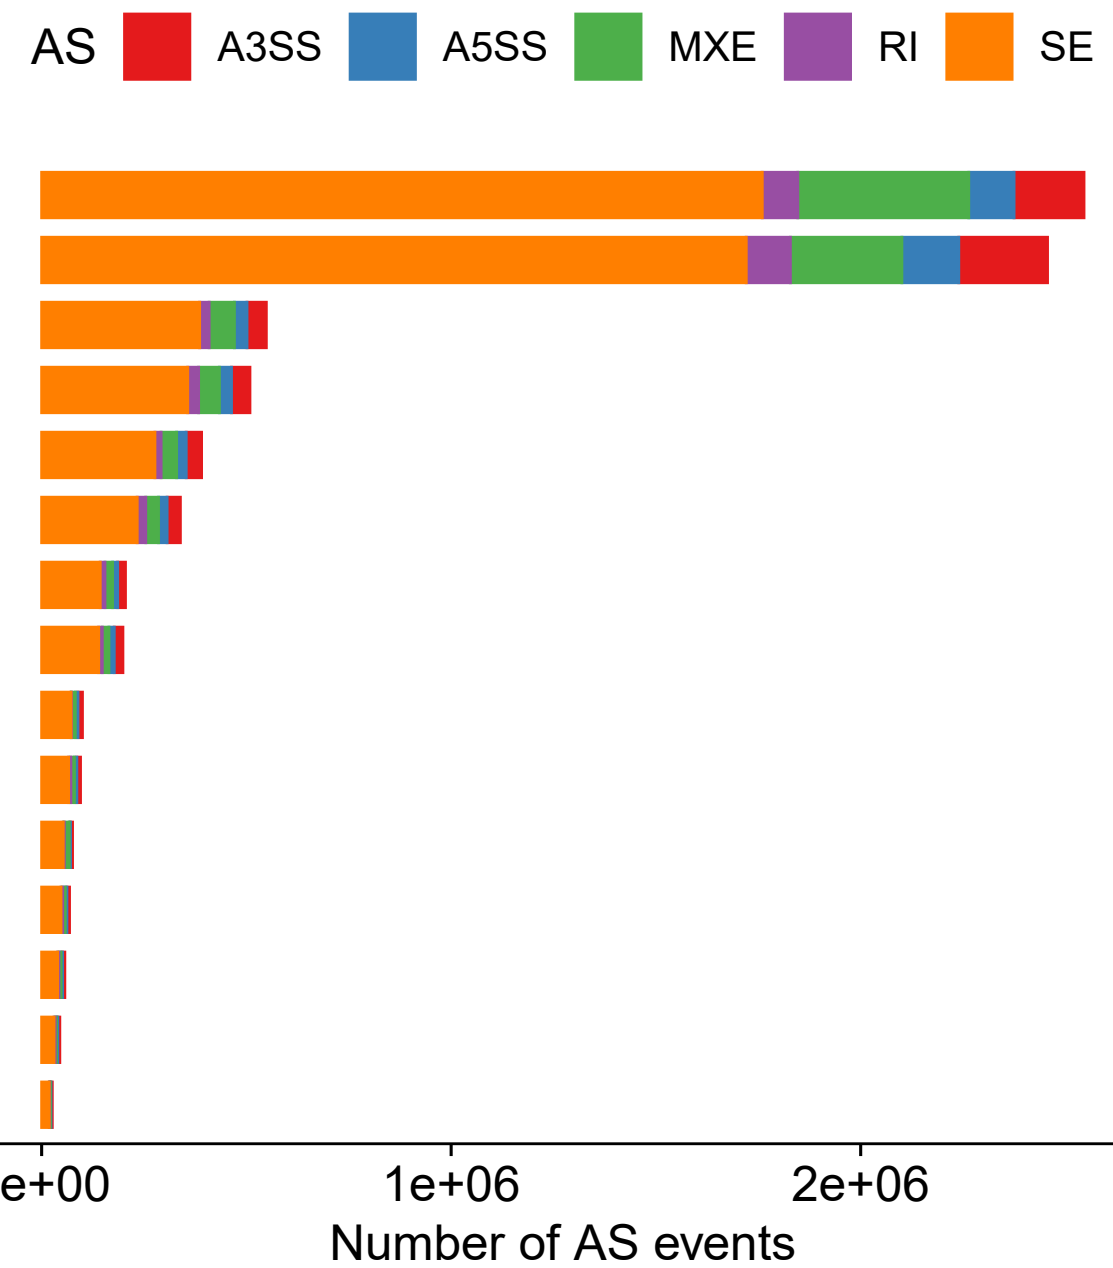**D**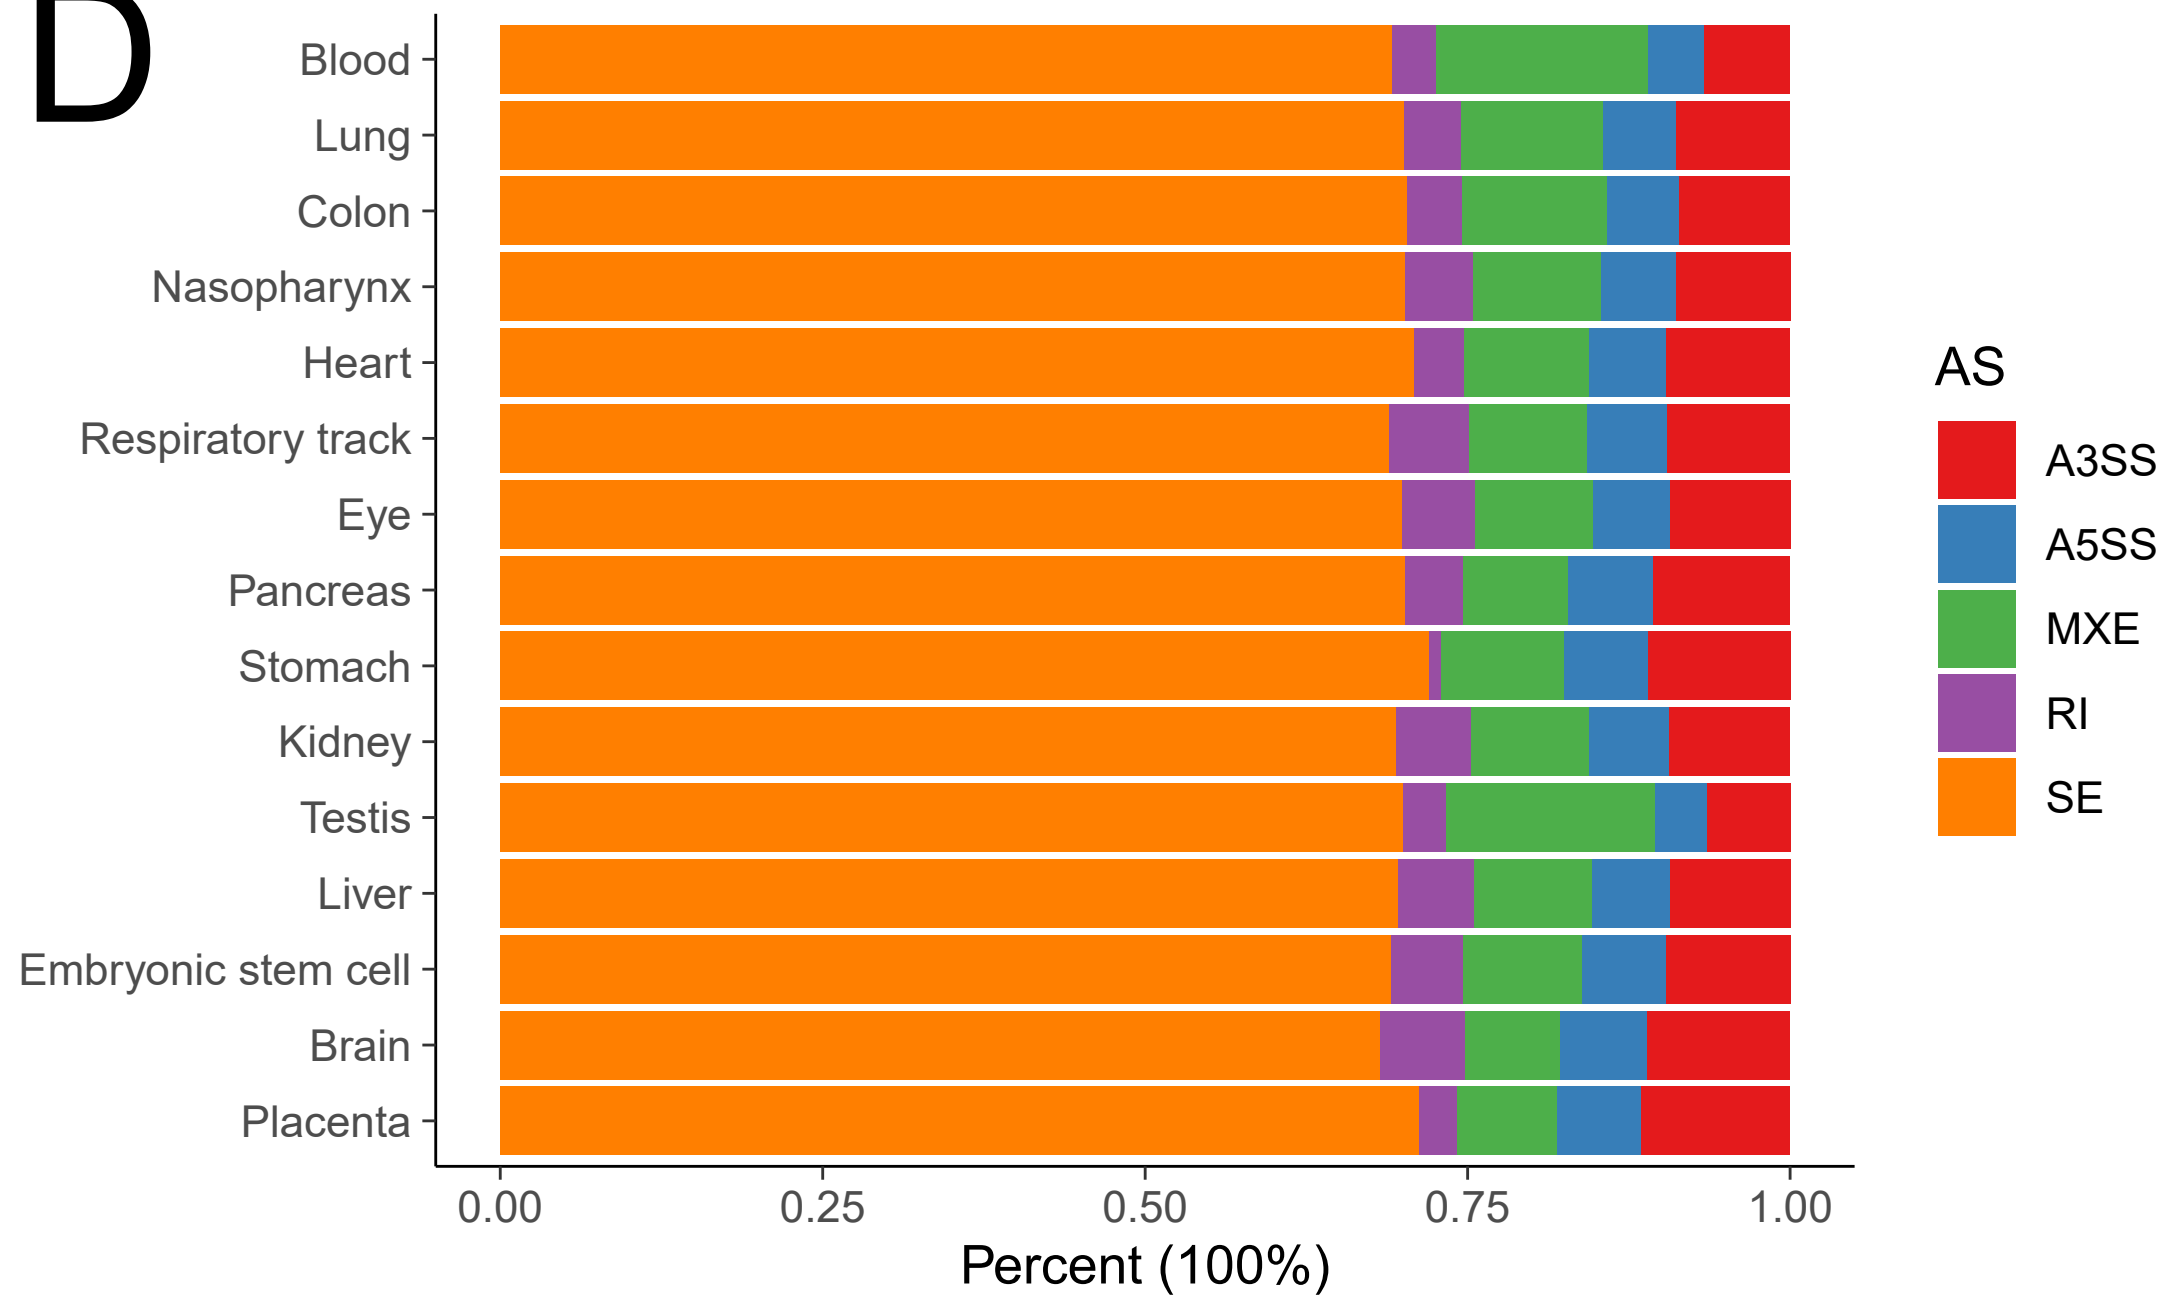

Supplement: MOESM3 [file 23624454]
